# Supplementary material for: Quasi-linear CuX2(X = Cl, Br) motif-built hybrid copper halides realizing encouraging nonlinear optical activities
Source: Royal Society of Chemistry journal article supplement (doi:10.1039/d3qi00297g), 2023-01-01
Supplement: d3qi00297g1.pdf [file d3qi00297g1.pdf]

## Supporting Information

### **Quasi-Linear $\text{CuX}_2$ ( $\text{X} = \text{Cl}, \text{Br}$ ) Motif-Built Hybrid Copper Halides Realizing Encouraging Nonlinear Optical Activities**

Jing-Li Qi,<sup>a</sup> Jiajing Wu,<sup>a\*</sup> Yue Guo,<sup>a</sup> Zhong-Ping Xu,<sup>a</sup> Wenlong Liu,<sup>a</sup> and Sheng-Ping Guo<sup>a\*</sup>

<sup>a</sup>School of Chemistry and Chemical Engineering, Yangzhou University, Yangzhou, Jiangsu 225002, P. R. China.

\*E-mail: spguo@yzu.edu.cn, jiajingw@yzu.edu.cn.

## Contents

**Table S1** Crystal data and structure refinement of  $(C_{20}H_{20}P)CuX_2$  ( $X = Cl, Br$ ).

**Table S2** Fractional atomic coordinates ( $\times 10^4$ ) and equivalent isotropic displacement parameters ( $\text{\AA}^2 \times 10^3$ ) for  $(C_{20}H_{20}P)CuX_2$  ( $X = Cl, Br$ ).  $U_{eq}$  is defined as 1/3 of the trace of the orthogonalised  $U_{ij}$  tensor.

**Table S3** Bond lengths for  $(C_{20}H_{20}P)CuX_2$  ( $X = Cl, Br$ ).

**Table S4** Bond angles for  $(C_{20}H_{20}P)CuX_2$  ( $X = Cl, Br$ ).

**Table S5** The  $x/y/z$ -projections of local dipole moments (DM) of  $[CuX_2]^-$  in one-unit cell of  $(C_{20}H_{20}P)CuX_2$  ( $X = Cl, Br$ ).

**Table S6** Point charge model analysis of  $(C_{20}H_{20}P)CuX_2$  ( $X = Cl, Br$ ). According to the crystal structure data collected at 296 K, we select a unit cell and assume that the centers of the positive charges of the organic cations and the negative charges of the  $[CuX_2]^-$  are located on the P atoms and Cu atoms, respectively.

**Table S7** Bond valance sum of  $Cu^+$  ion in  $(C_{20}H_{20}P)CuX_2$  ( $X = Cl, Br$ ).

**Table S8** Comparison of structural feature and optical performance for  $ACuX_2$  ( $A =$  organic cation,  $X = Cl, Br$ )

**Figure S1** Crystal structure of  $(C_{20}H_{20}P)CuBr_2$ .

**Figure S2** Structure of  $(C_{20}H_{20}P)CuCl_2$  viewed along the  $c$ -axis (a) and  $a$ -axis (b)

**Figure S3** The nearest distance of  $Cu \cdots Cu$  in  $(C_{20}H_{20}P)CuCl_2$  (a) and  $(C_{20}H_{20}P)CuBr_2$  (b).

**Figure S4** The EDS analysis for  $(C_{20}H_{20}P)CuCl_2$  (a) and  $(C_{20}H_{20}P)CuBr_2$  (b).

**Figure S5** Distribution of P and Cu atoms in unit cells of  $(C_{20}H_{20}P)CuCl_2$  (a) and  $(C_{20}H_{20}P)CuBr_2$  (b).

**Figure S6** Dipole moments of  $[CuX_2]^-$  in one-unit cell. (a)  $(C_{20}H_{20}P)CuCl_2$ ; (b)  $(C_{20}H_{20}P)CuBr_2$ ; Blue:  $[CuX_2]^-$ . The red arrows in the middle present the total dipole moments of the inorganic parts

**Figure S7** PLE and PL spectra of  $(C_{20}H_{20}P)CuCl_2$  (a) and  $(C_{20}H_{20}P)CuBr_2$  (b).

**Table S1.** Crystal data and structure refinement of (C<sub>20</sub>H<sub>20</sub>P)CuX<sub>2</sub> (X=Cl, Br).

|                                                       |                                                               |                                                               |
|-------------------------------------------------------|---------------------------------------------------------------|---------------------------------------------------------------|
| Empirical formula                                     | C <sub>20</sub> H <sub>20</sub> PCuCl <sub>2</sub>            | C <sub>20</sub> H <sub>20</sub> PCuBr <sub>2</sub>            |
| Formula weight                                        | 425.77                                                        | 514.69                                                        |
| Temperature/(K)                                       | 296                                                           | 296                                                           |
| Crystal system                                        | monoclinic                                                    | monoclinic                                                    |
| Space group                                           | <i>P</i> 2 <sub>1</sub>                                       | <i>P</i> 2 <sub>1</sub>                                       |
| <i>a</i> /Å                                           | 9.4777(4)                                                     | 9.7557(4)                                                     |
| <i>b</i> /Å                                           | 12.2690(6)                                                    | 12.2416(5)                                                    |
| <i>c</i> /Å                                           | 9.6477(4)                                                     | 9.7625(4)                                                     |
| $\alpha$ /°                                           | 90                                                            | 90                                                            |
| $\beta$ /°                                            | 117.7870(10)                                                  | 118.6090(10)                                                  |
| $\gamma$ /°                                           | 90                                                            | 90                                                            |
| Volume/Å <sup>3</sup>                                 | 992.49(8)                                                     | 1023.54(7)                                                    |
| <i>Z</i>                                              | 2                                                             | 2                                                             |
| $\rho_{\text{calc}}$ g/cm <sup>3</sup>                | 1.425                                                         | 1.67                                                          |
| $\mu$ /mm <sup>-1</sup>                               | 1.449                                                         | 5.048                                                         |
| F(000)                                                | 436                                                           | 508                                                           |
| 2 $\theta$ range for data collection/°                | 4.772 to 56.724                                               | 4.752 to 59.372                                               |
| Index ranges                                          | -12 ≤ <i>h</i> ≤ 10, -16 ≤ <i>k</i> ≤ 16, -10 ≤ <i>l</i> ≤ 12 | -13 ≤ <i>h</i> ≤ 13, -16 ≤ <i>k</i> ≤ 17, -13 ≤ <i>l</i> ≤ 13 |
| Reflections collected                                 | 14950                                                         | 16823                                                         |
| Independent reflections                               | 4928 [R <sub>int</sub> = 0.0299, R <sub>sigma</sub> = 0.0486] | 5718 [R <sub>int</sub> = 0.0598, R <sub>sigma</sub> = 0.0579] |
| Data/restraints/parameters                            | 4928/1/218                                                    | 5718/1/218                                                    |
| Goodness-of-fit on F <sup>2</sup>                     | 1.032                                                         | 1.019                                                         |
| Final R indexes [ <i>I</i> ≥ 2 $\sigma$ ( <i>I</i> )] | R1 = 0.0366, wR2 = 0.0663                                     | R1 = 0.0419, wR2 = 0.0758                                     |
| Final R indexes [all data]                            | R1 = 0.0641, wR2 = 0.0740                                     | R1 = 0.0846, wR2 = 0.0865                                     |
| Largest diff. peak/hole/e Å <sup>-3</sup>             | 0.20/-0.21                                                    | 0.36/-0.30                                                    |
| Flack parameter                                       | 0.015(6)                                                      | -0.013(6)                                                     |

R1 =  $\Sigma||F_o|-|F_c|| / \Sigma|F_o|$ , wR2 =  $\{\Sigma[w(|F_o|^2 - |F_c|^2)^2] / \Sigma[w(|F_o|^4)]\}^{1/2}$  and  $w = 1/[\sigma^2(F_o^2) + (0.0462P)^2]$  where  $P = (F_o^2 + 2F_c^2)/3$

**Table S2.** Fractional atomic coordinates ( $\times 10^4$ ) and equivalent isotropic displacement parameters ( $\text{\AA}^2 \times 10^3$ ) for  $(\text{C}_{20}\text{H}_{20}\text{P})\text{CuX}_2$  ( $\text{X} = \text{Cl}, \text{Br}$ ).

| Atom                                                | <i>x</i>   | <i>y</i>   | <i>z</i>    | $U_{eq}^a$ |
|-----------------------------------------------------|------------|------------|-------------|------------|
| $(\text{C}_{20}\text{H}_{20}\text{P})\text{CuCl}_2$ |            |            |             |            |
| Cu (1)                                              | 1133.2(5)  | 5460.3(4)  | 975.8(5)    | 65.69(18)  |
| Cl (1)                                              | 908.2(12)  | 6033.0(11) | 2905.0(13)  | 74.9(3)    |
| Cl (2)                                              | 1308.5(14) | 4977.0(13) | -1010.5(14) | 96.8(5)    |
| P (1)                                               | 5793.8(9)  | 4308.6(7)  | 6654.4(9)   | 37.07(19)  |
| C (1)                                               | 7202(5)    | 3188(4)    | 9525(4)     | 69.1(12)   |
| C (2)                                               | 7375(4)    | 3483(3)    | 8076(4)     | 49.7(9)    |
| C (3)                                               | 3930(4)    | 3602(3)    | 5924(4)     | 41.5(8)    |
| C (4)                                               | 3110(4)    | 3585(3)    | 6799(4)     | 48.3(9)    |
| C (5)                                               | 1727(4)    | 2992(3)    | 6290(5)     | 56.9(10)   |
| C (6)                                               | 1136(4)    | 2427(4)    | 4894(5)     | 61.3(11)   |
| C (7)                                               | 1928(5)    | 2448(3)    | 4014(5)     | 59.4(10)   |
| C (8)                                               | 3332(4)    | 3029(3)    | 4526(4)     | 50.3(9)    |
| C (9)                                               | 6245(4)    | 4621(3)    | 5086(3)     | 36.9(7)    |
| C (10)                                              | 5129(4)    | 5194(3)    | 3800(4)     | 48.3(9)    |
| C (11)                                              | 5478(4)    | 5480(4)    | 2615(4)     | 56.6(9)    |
| C (12)                                              | 6946(4)    | 5233(3)    | 2729(4)     | 54.8(10)   |
| C (13)                                              | 8055(4)    | 4684(3)    | 3999(4)     | 55.1(9)    |
| C (14)                                              | 7709(4)    | 4367(3)    | 5181(4)     | 47.3(8)    |
| C (15)                                              | 5662(4)    | 5561(3)    | 7546(3)     | 39.3(7)    |
| C (16)                                              | 7036(4)    | 6027(3)    | 8695(4)     | 49.2(9)    |
| C (17)                                              | 6992(6)    | 7028(3)    | 9319(4)     | 61.6(11)   |
| C (18)                                              | 5582(5)    | 7571(3)    | 8804(4)     | 59.2(10)   |
| C (19)                                              | 4205(5)    | 7119(3)    | 7669(5)     | 62.9(11)   |
| C (20)                                              | 4233(4)    | 6118(3)    | 7030(4)     | 51.4(9)    |
| $(\text{C}_{20}\text{H}_{20}\text{P})\text{CuBr}_2$ |            |            |             |            |
| Cu (1)                                              | 9044.2(9)  | 4525.9(6)  | 8869.7(8)   | 63.3(2)    |
| Br (1)                                              | 7029.4(7)  | 3993.0(6)  | 9163.4(7)   | 71.4(2)    |
| Br (2)                                              | 11140.6(8) | 4945.6(6)  | 8660.9(8)   | 82.3(2)    |
| P (1)                                               | 3311.5(14) | 5701.5(9)  | 4198.6(13)  | 36.2(3)    |
| C (1)                                               | 6145(6)    | 4801(4)    | 4851(5)     | 48.9(12)   |
| C (2)                                               | 7311(6)    | 4500(5)    | 4524(7)     | 56.8(14)   |
| C (3)                                               | 7218(7)    | 4789(5)    | 3110(7)     | 56.0(14)   |
| C (4)                                               | 5971(7)    | 5373(5)    | 2048(6)     | 55.5(14)   |

| Atom   | <i>x</i> | <i>y</i> | <i>x</i> | $U_{eq}^a$ |
|--------|----------|----------|----------|------------|
| C (5)  | 4779(6)  | 5683(4)  | 2362(6)  | 48.7(12)   |
| C (6)  | 4869(6)  | 5394(4)  | 3771(5)  | 37.9(10)   |
| C (7)  | 2943(6)  | 3913(4)  | 5740(6)  | 48.7(12)   |
| C (8)  | 2308(7)  | 2904(5)  | 5757(7)  | 60.3(15)   |
| C (9)  | 1185(7)  | 2452(5)  | 4424(8)  | 61.0(15)   |
| C (10) | 668(7)   | 2966(5)  | 3023(8)  | 58.9(14)   |
| C (11) | 1281(6)  | 3966(5)  | 2978(6)  | 50.0(12)   |
| C (12) | 2438(5)  | 4447(4)  | 4335(5)  | 38.6(10)   |
| C (13) | 3233(6)  | 6444(4)  | 6839(6)  | 48.4(12)   |
| C (14) | 3778(7)  | 7018(5)  | 8197(7)  | 56.9(14)   |
| C (15) | 5179(7)  | 7571(5)  | 8781(6)  | 60.0(15)   |
| C (16) | 6023(7)  | 7544(5)  | 7988(7)  | 59.0(15)   |
| C (17) | 5473(6)  | 6969(4)  | 6602(6)  | 49.2(13)   |
| C (18) | 4083(6)  | 6410(4)  | 6023(5)  | 40.0(11)   |
| C (19) | 1880(6)  | 6527(4)  | 2651(6)  | 51.4(13)   |
| C (20) | 447(7)   | 6776(5)  | 2820(9)  | 69.6(18)   |

<sup>a</sup> $U_{eq}$  is defined as 1/3 of the trace of the orthogonalised  $U_{ij}$  tensor.

**Table S3.** Bond lengths for (C<sub>20</sub>H<sub>20</sub>P)CuX<sub>2</sub> (X = Cl, Br)

| Atom                                                 | Atom   | Length/Å | Atom   | Atom   | Length/Å |
|------------------------------------------------------|--------|----------|--------|--------|----------|
| (C <sub>20</sub> H <sub>20</sub> P)CuCl <sub>2</sub> |        |          |        |        |          |
| Cu (1)                                               | Cl (1) | 2.091(1) | C (10) | C (11) | 1.376(4) |
| Cu (1)                                               | Cl (2) | 2.085(1) | C (10) | C (9)  | 1.388(4) |
| P (1)                                                | C (15) | 1.794(4) | C (12) | C (11) | 1.377(5) |
| P (1)                                                | C (3)  | 1.791(3) | C (12) | C (13) | 1.364(5) |
| P (1)                                                | C (2)  | 1.800(3) | C (14) | C (13) | 1.382(5) |
| P (1)                                                | C (9)  | 1.795(3) | C (14) | C (9)  | 1.383(4) |
| C (2)                                                | C (1)  | 1.525(5) | C (15) | C (20) | 1.386(4) |
| C (3)                                                | C (8)  | 1.386(5) | C (15) | C (16) | 1.380(5) |
| C (3)                                                | C (4)  | 1.389(4) | C (17) | C (16) | 1.377(5) |
| C (4)                                                | C (5)  | 1.373(5) | C (17) | C (18) | 1.362(6) |
| C (6)                                                | C (7)  | 1.370(5) | C (18) | C (19) | 1.371(6) |
| C (6)                                                | C (5)  | 1.380(5) | C (20) | C (19) | 1.379(5) |
| C (7)                                                | C (8)  | 1.382(5) |        |        |          |
| (C <sub>20</sub> H <sub>20</sub> P)CuBr <sub>2</sub> |        |          |        |        |          |
| Cu (1)                                               | Br (1) | 2.216(1) | C (9)  | C (8)  | 1.355(8) |
| Cu (1)                                               | Br (2) | 2.211(9) | C (10) | C (9)  | 1.364(9) |
| P (1)                                                | C (6)  | 1.798(5) | C (11) | C (10) | 1.372(8) |
| P (1)                                                | C (12) | 1.792(5) | C (12) | C (11) | 1.394(7) |
| P (1)                                                | C (18) | 1.790(5) | C (12) | C (7)  | 1.380(6) |
| P (1)                                                | C (19) | 1.798(5) | C (13) | C (14) | 1.363(7) |
| C (2)                                                | C (1)  | 1.371(7) | C (15) | C (16) | 1.375(8) |
| C (2)                                                | C (3)  | 1.386(8) | C (15) | C (14) | 1.380(8) |
| C (3)                                                | C (4)  | 1.363(8) | C (16) | C (17) | 1.385(7) |
| C (5)                                                | C (4)  | 1.390(7) | C (18) | C (13) | 1.399(7) |
| C (6)                                                | C (1)  | 1.390(7) | C (18) | C (17) | 1.376(7) |
| C (6)                                                | C (5)  | 1.381(6) | C (19) | C (20) | 1.515(8) |
| C (7)                                                | C (8)  | 1.386(8) |        |        |          |

**Table S4.** Bond angles for (C<sub>20</sub>H<sub>20</sub>P)CuX<sub>2</sub> (X = Cl, Br).

| Atom                                                 | Atom   | Atom   | Angle/°    | Atom   | Atom   | Atom   | Angle/°  |
|------------------------------------------------------|--------|--------|------------|--------|--------|--------|----------|
| (C <sub>20</sub> H <sub>20</sub> P)CuCl <sub>2</sub> |        |        |            |        |        |        |          |
| Cl (2)                                               | Cu (1) | Cl (1) | 176.66(6)  | C (10) | C (11) | C (12) | 120.2(3) |
| C (15)                                               | P (1)  | C (2)  | 109.66(15) | C (10) | C (9)  | P (1)  | 118.7(2) |
| C (15)                                               | P (1)  | C (9)  | 108.58(15) | C (11) | C (10) | C (9)  | 119.6(3) |
| C (3)                                                | P (1)  | C (15) | 109.08(15) | C (12) | C (13) | C (14) | 120.0(3) |
| C (3)                                                | P (1)  | C (2)  | 110.21(17) | C (13) | C (14) | C (9)  | 119.9(3) |
| C (3)                                                | P (1)  | C (9)  | 110.52(14) | C (13) | C (12) | C (11) | 120.5(3) |
| C (9)                                                | P (1)  | C (2)  | 108.76(15) | C (14) | C (9)  | P (1)  | 121.4(3) |
| C (1)                                                | C (2)  | P (1)  | 115.1(2)   | C (14) | C (9)  | C (10) | 119.8(3) |
| C (4)                                                | C (3)  | P (1)  | 119.8(3)   | C (16) | C (15) | P (1)  | 119.3(3) |
| C (4)                                                | C (5)  | C (6)  | 120.1(3)   | C (16) | C (15) | C (20) | 118.9(3) |
| C (5)                                                | C (4)  | C (3)  | 120.1(3)   | C (17) | C (16) | C (15) | 120.7(4) |
| C (6)                                                | C (7)  | C (8)  | 120.2(4)   | C (17) | C (18) | C (19) | 120.0(4) |
| C (7)                                                | C (6)  | C (5)  | 120.3(4)   | C (18) | C (17) | C (16) | 120.1(4) |
| C (7)                                                | C (8)  | C (3)  | 119.9(3)   | C (18) | C (19) | C (20) | 120.5(4) |
| C (8)                                                | C (3)  | P (1)  | 120.6(2)   | C (19) | C (20) | C (15) | 119.8(4) |
| C (8)                                                | C (3)  | C (4)  | 119.5(3)   | C (20) | C (15) | P (1)  | 121.7(3) |
| (C <sub>20</sub> H <sub>20</sub> P)CuBr <sub>2</sub> |        |        |            |        |        |        |          |
| Br (2)                                               | Cu (1) | Br (1) | 175.8(5)   | C (11) | C (12) | P (1)  | 119.3(4) |
| C (1)                                                | C (2)  | C (3)  | 119.8(5)   | C (12) | P (1)  | C (6)  | 108.8(2) |
| C (1)                                                | C (6)  | P (1)  | 118.9(3)   | C (12) | P (1)  | C (19) | 109.8(2) |
| C (2)                                                | C (1)  | C (6)  | 120.4(4)   | C (12) | C (7)  | C (8)  | 119.0(5) |
| C (3)                                                | C (4)  | C (5)  | 120.8(5)   | C (13) | C (18) | P (1)  | 120.0(4) |
| C (4)                                                | C (3)  | C (2)  | 120.0(5)   | C (13) | C (14) | C (15) | 120.2(5) |
| C (5)                                                | C (6)  | P (1)  | 121.3(4)   | C (14) | C (13) | C (18) | 120.5(5) |
| C (5)                                                | C (6)  | C (1)  | 119.7(4)   | C (15) | C (16) | C (17) | 120.4(6) |
| C (6)                                                | C (5)  | C (4)  | 119.2(5)   | C (16) | C (15) | C (14) | 119.8(5) |
| C (6)                                                | P (1)  | C (19) | 109.0(2)   | C (17) | C (18) | P (1)  | 120.8(4) |
| C (7)                                                | C (12) | P (1)  | 121.6(4)   | C (17) | C (18) | C (13) | 119.2(5) |
| C (7)                                                | C (12) | C (11) | 119.1(4)   | C (18) | P (1)  | C (12) | 109.2(2) |
| C (8)                                                | C (9)  | C (10) | 121.0(5)   | C (18) | P (1)  | C (6)  | 109.5(2) |
| C (9)                                                | C (10) | C (11) | 119.1(5)   | C (18) | P (1)  | C (19) | 110.6(2) |
| C (9)                                                | C (8)  | C (7)  | 120.9(5)   | C (18) | C (17) | C (16) | 119.9(5) |
| C (10)                                               | C (11) | C (12) | 120.9(5)   | C (20) | C (19) | P (1)  | 114.1(4) |

**Table S5.** The  $x/y/z$ -projections of local dipole moment (DM) of  $[\text{CuX}]^-$  in one-unit cell of  $(\text{C}_{20}\text{H}_{20}\text{P})\text{CuX}_2$  ( $\text{X} = \text{Cl}, \text{Br}$ ).

| Ion                                        | $\mu_x$ (D) | $\mu_y$ (D) | $\mu_z$ (D) |
|--------------------------------------------|-------------|-------------|-------------|
| $\text{C}_{20}\text{H}_{20}\text{PCuCl}_2$ |             |             |             |
| $[\text{CuCl}_2]^-$                        | 0.197       | -0.142      | -0.288      |
| $[\text{CuCl}_2]^-$                        | -0.197      | -0.142      | 0.288       |
| Total $[\text{CuCl}_2]^-$                  | 0           | -0.284      | 0           |
| $\text{C}_{20}\text{H}_{20}\text{PCuBr}_2$ |             |             |             |
| $[\text{CuBr}_2]^-$                        | -1.225      | 0.757       | 1.597       |
| $[\text{CuBr}_2]^-$                        | 1.225       | 0.757       | -1.597      |
| Total $[\text{CuBr}_2]^-$                  | 0           | 1.514       | 0           |

**Table S6.** Point charge model analysis of  $(\text{C}_{20}\text{H}_{20}\text{P})\text{CuX}_2$  ( $\text{X}=\text{Cl}, \text{Br}$ ). According to the crystal structure data collected at 296 K, we select a unit cell and assume that the centers of the positive charges of the organic cations and the negative charges of the  $(\text{CuX}_2)^{2-}$  are located on the P atoms and Cu atoms, respectively.

| $(\text{C}_{20}\text{H}_{20}\text{P})\text{CuCl}_2$                                                                                                                                                                                   |                          |                             |
|---------------------------------------------------------------------------------------------------------------------------------------------------------------------------------------------------------------------------------------|--------------------------|-----------------------------|
| Atom                                                                                                                                                                                                                                  | Atom coordinate          | Coordinate of charge center |
| Cu1                                                                                                                                                                                                                                   | (0.8867,0.0462,0.9024)   | ( 0.5,0.2960,0.5 )          |
| Cu1'                                                                                                                                                                                                                                  | (0.1133,0.5460,0.0976)   |                             |
| P1                                                                                                                                                                                                                                    | (0.5794,0.4309,0.6654)   | (0.5,0.6808,0.5)            |
| P1'                                                                                                                                                                                                                                   | (0.4206,0.9308,0.3346)   |                             |
| $\mu_{\text{total}} = (0.6808-0.2960) \times b \times 2e = 0.3848 \times 12.2690 \times 10^{-10} \text{ m} \times 2 \times 1.6 \times 10^{-19} \text{ C}$<br>$= 1.5626 \times 10^{-28} \text{ C} \cdot \text{m} = 48.678 \text{ D}$   |                          |                             |
| $(\text{C}_{20}\text{H}_{20}\text{P})\text{CuBr}_2$                                                                                                                                                                                   |                          |                             |
| Atom                                                                                                                                                                                                                                  | Atom coordinate          | Coordinate of charge center |
| Cu1                                                                                                                                                                                                                                   | ( 0.1129,0.9552,0.0956 ) | ( 0.5,0.7026,0.5 )          |
| Cu1'                                                                                                                                                                                                                                  | (0.8871,0.4550,0.9044)   |                             |
| P1                                                                                                                                                                                                                                    | (0.5804,0.0722,0.6689)   | (0.5,0.3201,0.5)            |
| P1'                                                                                                                                                                                                                                   | (0.4196,0.5722,0.3311)   |                             |
| $\mu_{\text{total}} = (0.3201-0.7026) \times b \times 2e = -0.3825 \times 12.2319 \times 10^{-10} \text{ m} \times 2 \times 1.6 \times 10^{-19} \text{ C}$<br>$= -1.4971 \times 10^{-28} \text{ C} \cdot \text{m} = 46.638 \text{ D}$ |                          |                             |



**Table S7.** Bond valence sum of Cu<sup>+</sup> ion in (C<sub>20</sub>H<sub>20</sub>P)CuX<sub>2</sub> (X = Cl, Br).

| Compound                                             | Bond     | Bond distance/Å | Bond valence | Sum        |
|------------------------------------------------------|----------|-----------------|--------------|------------|
| (C <sub>20</sub> H <sub>20</sub> P)CuCl <sub>2</sub> | Cu-Cl(1) | 2.0914          | 0.580233701  | 1.17027216 |
|                                                      | Cu-Cl(2) | 2.0852          | 0.590038454  |            |
| (C <sub>20</sub> H <sub>20</sub> P)CuBr <sub>2</sub> | Cu-Br(1) | 2.2143          | 0.607679236  | 1.22030563 |
|                                                      | Cu-Br(2) | 2.2113          | 0.612626394  |            |

**Table S8.** Comparison of structural feature and optical performance for ACuX<sub>2</sub> (A= organic cation, X = Cl, Br )

| Compound                                             | Structure | SHG        | PL<br>/ nm | Band<br>gap<br>Type | Optical<br>Band gap /eV | Theoretical<br>Band gap /eV | Ref.         |
|------------------------------------------------------|-----------|------------|------------|---------------------|-------------------------|-----------------------------|--------------|
| (C <sub>12</sub> H <sub>20</sub> N)CuCl <sub>2</sub> | CS        | -          | 505        | Direct              | 4.05                    | 3.82                        | 1            |
| (C <sub>12</sub> H <sub>20</sub> N)CuBr <sub>2</sub> | CS        | -          | 507        | Direct              | 3.13                    | -                           | 2            |
| (C <sub>16</sub> H <sub>28</sub> N)CuCl <sub>2</sub> | CS        | -          | 510        | Direct              | 3.43                    | 3.85                        | 3            |
| (C <sub>16</sub> H <sub>28</sub> N)CuBr <sub>2</sub> | CS        | -          | 498        | Direct              | 3.92                    | 3.38                        | 4            |
| (C <sub>24</sub> H <sub>20</sub> P)CuCl <sub>2</sub> | NCS       | No report  | 562        | -                   | 3.67                    | -                           | 5            |
| (C <sub>24</sub> H <sub>20</sub> P)CuBr <sub>2</sub> | CS        | -          | 526        | -                   | 3.67                    | -                           | 5            |
| (C <sub>24</sub> H <sub>20</sub> P)CuBr <sub>2</sub> | CS        | -          | 526        | -                   | 2.57                    | 2.09                        | 6            |
| (C <sub>20</sub> H <sub>20</sub> P)CuCl <sub>2</sub> | NCS       | 1.1 × KDP  | 523        | Indirect            | 3.56                    | 2.43                        | this<br>work |
| (C <sub>20</sub> H <sub>20</sub> P)CuBr <sub>2</sub> | NCS       | 0.89 × KDP | 533        | Indirect            | 3.64                    | 2.52                        | this<br>work |

Note: CS-centrosymmetric; NCS-noncentrosymmetric

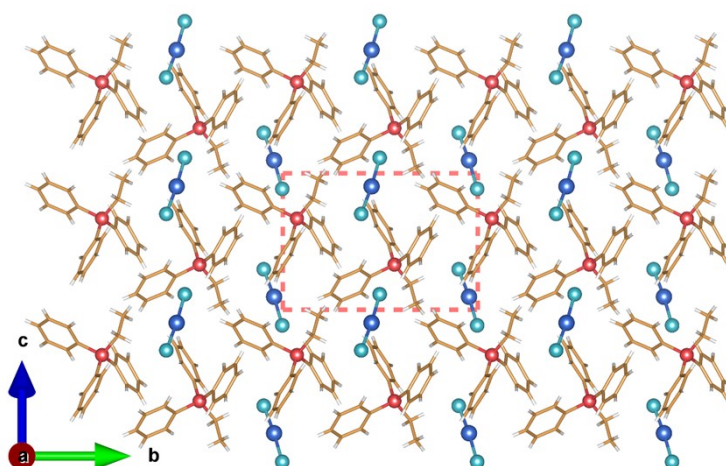

**Figure S1.** Crystal structure of  $(C_{20}H_{20}P)CuBr_2$ .

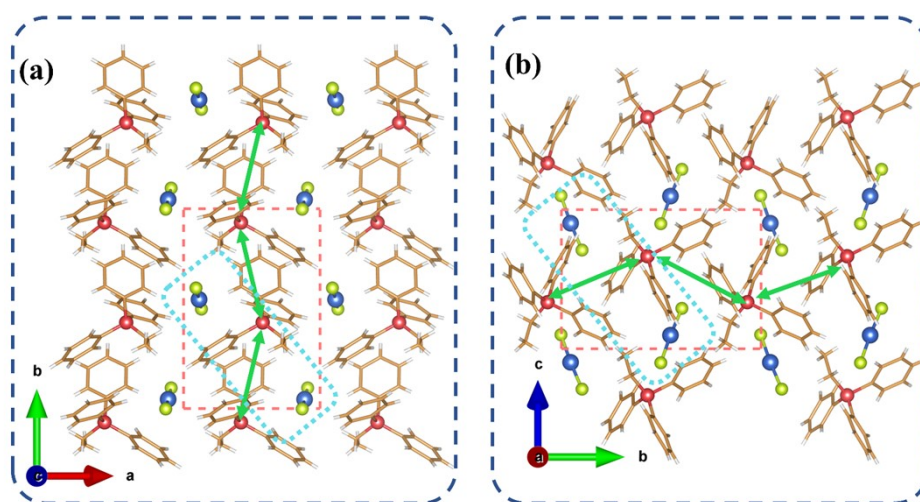

**Figure S2** Structure of  $(C_{20}H_{20}P)CuCl_2$  viewed along the  $c$ -axis (a) and  $a$ -axis (b)

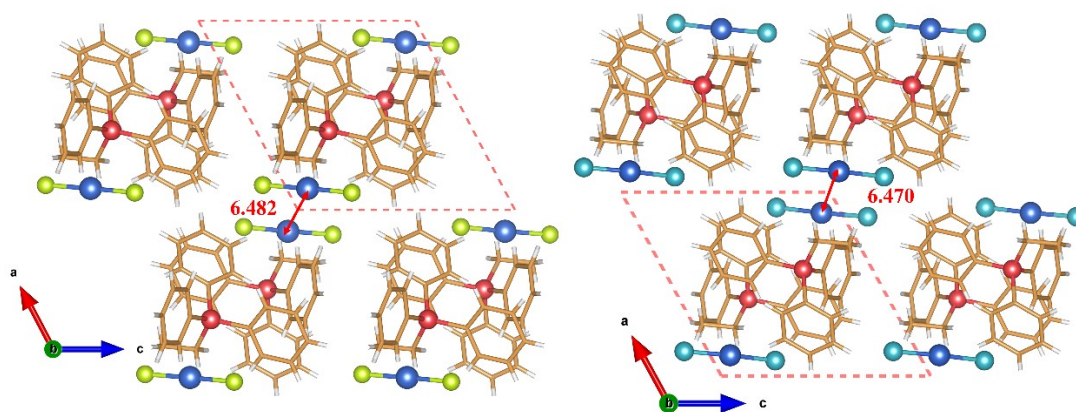

**Figure S3.** The nearest distance of  $Cu \cdots Cu$  in  $(C_{20}H_{20}P)CuCl_2$  (a) and  $(C_{20}H_{20}P)CuBr_2$  (b).

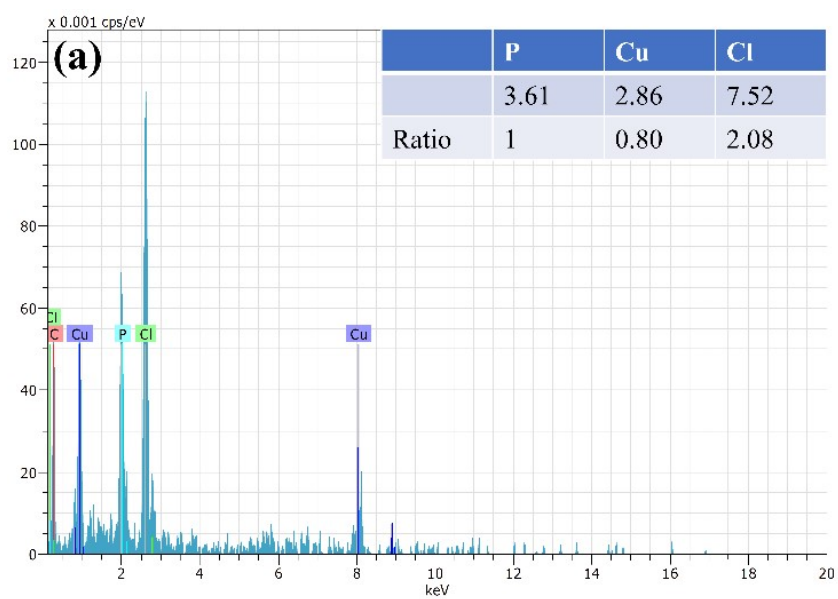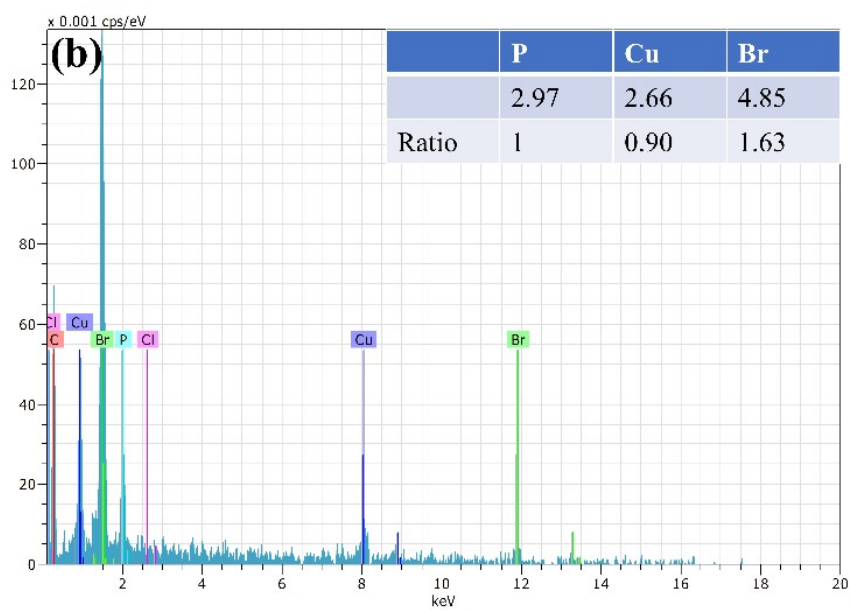

**Figure S4.** The EDS analysis for  $(C_{20}H_{20}P)CuCl_2$  (a) and  $(C_{20}H_{20}P)CuBr_2$  (b).

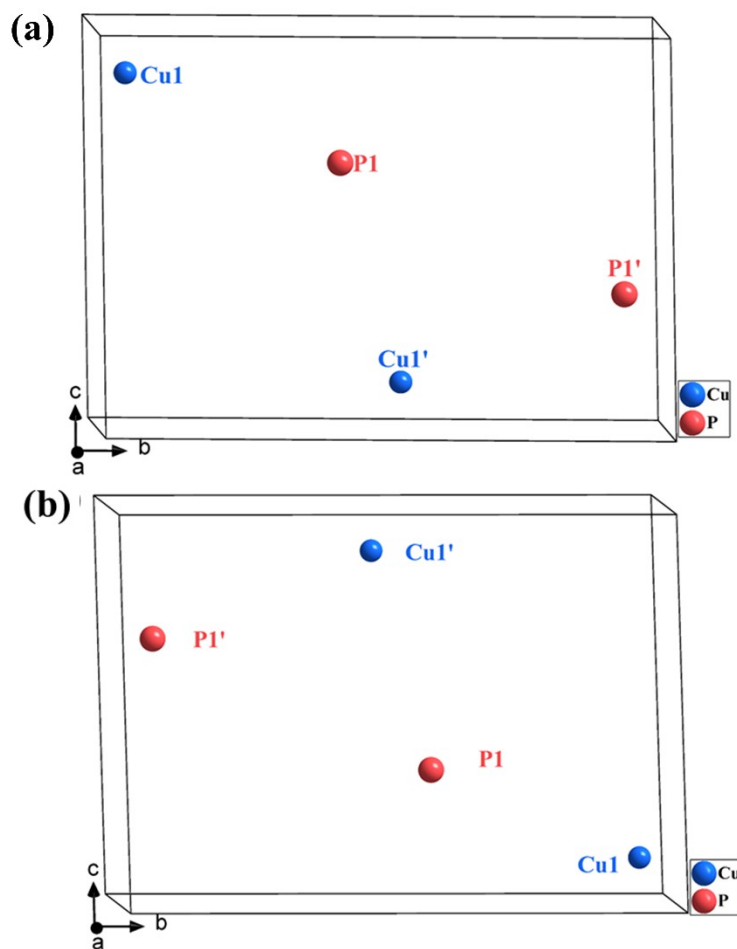

**Figure S5.** Distribution of P and Cu atoms in unit cells of  $(C_{20}H_{20}P)CuCl_2$  (a) and  $(C_{20}H_{20}P)CuBr_2$  (b).

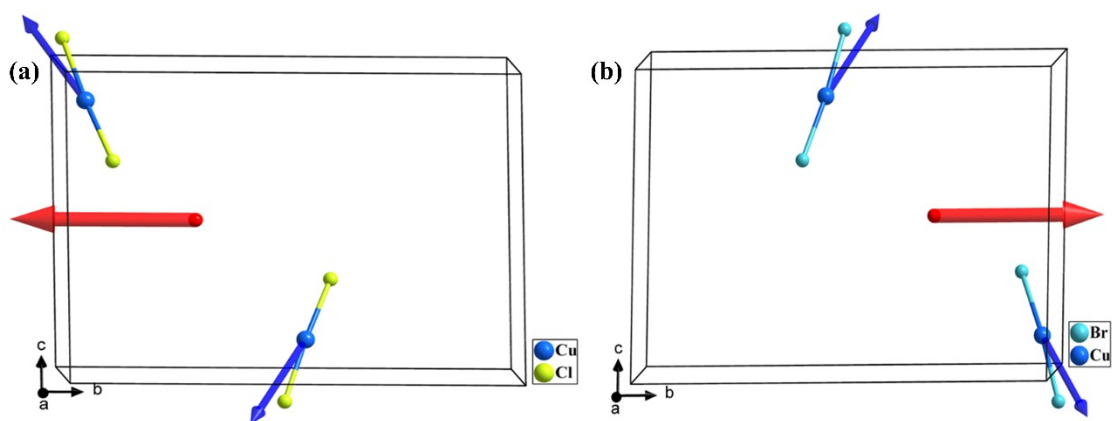

**Figure S6.** Dipole moments of  $[CuX_2]^-$  in one-unit cell. (a)  $(C_{20}H_{20}P)CuCl_2$ ; (b)  $(C_{20}H_{20}P)CuBr_2$ ; Blue:  $[CuX_2]^-$ . The red arrows in the middle present the total dipole moments of the inorganic parts.

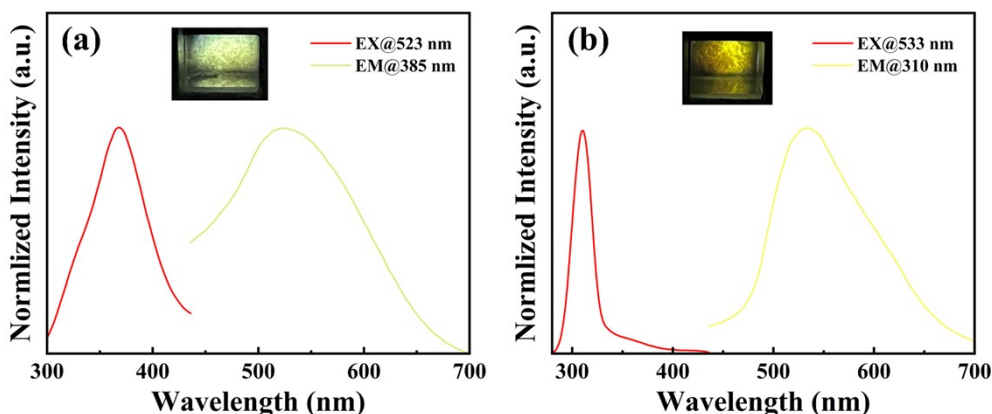

**Figure S7.** PLE and PL spectra of  $(C_{20}H_{20}P)CuCl_2$  (a) and  $(C_{20}H_{20}P)CuBr_2$  (b).

## Reference

1. H. Peng, Y. Tian, X. Wang, T. Dong, Z. Yu, Y. Xiao, Z. Zhang, J. Wang and B. Zou, Highly Efficient Broadband Green Emission of  $(TPA)CuCl_2$  Single Crystals: Understanding the Formation of Self-Trapped States, *The Journal of Physical Chemistry C*, 2022, **126**, 8545-8552.
2. S. Chen, J. Gao, J. Chang, Y. Li, C. Huangfu, H. Meng, Y. Wang, G. Xia and L. Feng, Family of Highly Luminescent Pure Ionic Copper(I) Bromide Based Hybrid Materials, *ACS Appl Mater Interfaces*, 2019, **11**, 17513-17520.
3. H. Peng, X. Wang, Y. Tian, T. Dong, Y. Xiao, T. Huang, Y. Guo, J. Wang and B. Zou, Water-Stable Zero-Dimensional  $(C_4H_9)_4NCuCl_2$  Single Crystal with Highly Efficient Broadband Green Emission, *J Phys Chem Lett*, 2021, **12**, 6639-6647.
4. H. Peng, Y. Tian, Z. Zhang, X. Wang, T. Huang, T. Dong, Y. Xiao, J. Wang and B. Zou, Bulk Assembly of Zero-Dimensional Organic Copper Bromide Hybrid with Bright Self-Trapped Exciton Emission and High Antiwater Stability, *The Journal of Physical Chemistry C*, 2021, **125**, 20014-20021.
5. D. A. Popy, T. D. Creason, Z. Zhang, D. J. Singh and B. Saparov, Electronic structures and optical properties of  $(Ph_4P)MX_2$  ( $M = Cu, Ag; X = Cl, Br$ ), *Journal of Solid State Chemistry*, 2022, **316**, 123626.
6. T. Xu, Y. Li, M. Nikl, R. Kucerkova, Z. Zhou, J. Chen, Y. Y. Sun, G. Niu, J. Tang, Q. Wang, G. Ren and Y. Wu, Lead-Free Zero-Dimensional Organic-Copper(I) Halides as Stable and Sensitive X-ray Scintillators, *ACS Appl Mater Interfaces*, 2022, **14**, 14157-14164.
